# Supplementary material for: A novel alignment-free method for detection of lateral genetic transfer based on TF-IDF
Source: PubMed Central journal article supplement (PMC4958984; doi:10.1038/srep30308), 2016-07-25
Supplement: srep30308-s1.pdf [file srep30308-s1.pdf]

## **Supplementary Material**

# **A novel alignment-free method for detection of lateral genetic transfer based on TF-IDF**

Yingnan Cong

Yao-ban Chan

Mark A. Ragan

## 1 Pseudocode for the TF-IDF algorithm

```
1. Begin
2.   Recognise all the different  $k$ -mers of size  $k$  and label as  $1, 2, \dots, U$ .
3.   // Compute Matrix  $\mathbf{M}$ 
4.    $\mathbf{M} \leftarrow \text{Zeros}(n \times U)$  // Zeros returns an all-zero matrix of the specified dimensions.
5.   For each sequence  $i$  do
6.     For each  $k$ -mer  $\kappa$  in sequence  $i$  do
7.        $\mathbf{M}(i, L(\kappa)) \leftarrow \mathbf{M}(i, L(\kappa)) + 1$  // L( $\kappa$ ) returns the label of  $k$ -mer  $\kappa$ .
8.     End For
9.   End For
10.  // Compute Matrix  $\mathbf{R}$ 
11.   $\mathbf{R} \leftarrow \text{Zeros}(n \times m)$ 
12.  For each sequence  $i$  do
13.    For each group  $j$  except  $\Theta(i)$  do //  $\Theta(i)$  returns the group of sequence  $i$ .
14.      For each sequence  $i'$  in group  $j$  do
15.         $\mathbf{R}(i, j) \leftarrow \mathbf{R}(i, j) + \Omega(i, i')$  //  $\Omega(i, i')$  returns the number of
16.          // common elements between sequences  $i$  and  $i'$ .
17.      End For
18.    End For
19.  End For
20.   $t \leftarrow \text{avg}(\mathbf{R})$  // avg( $\mathbf{R}$ ) returns the average value of elements of  $\mathbf{R}$ .
21.  // Compute  $\tau$ 
22.   $\tau \leftarrow \text{Zeros}(m)$ 
23.  For each group  $j$  do
24.     $\mathbf{K} \leftarrow \mathbf{M}(j, \circ)$  //  $\mathbf{M}(j, \circ)$  returns the rows that represent the sequences in  $j$ 
25.     $\tau(j) \leftarrow \text{numel}(\mathbf{K}) / \text{numel}(\text{unique}(\mathbf{K}))$ 
26.  End For
27.  // Detect LGTs
28.   $(i, j, v) \leftarrow \text{Fmax}(\mathbf{R})$  // Fmax( $\mathbf{R}$ ) returns the maximum value of  $\mathbf{R}$  as  $v$ , with
29.    // corresponding sequence  $i$  and group  $j$ .
30.  While  $v > t$ 
31.    // Cut sequence  $i$ 
32.     $\omega \leftarrow \text{Zeros}(m)$ 
33.    For each  $k$ -mer  $\kappa$  in sequence  $i$  do
34.       $\omega(i) \leftarrow \text{ismember}(\kappa, j)$  // ismember( $\kappa, j$ ) returns 1 if  $\kappa$  exists in at
35.        // least one sequence of species  $j$ , 0 otherwise.
36.    End For
37.     $\text{TagS} \leftarrow 0$ 
38.     $\text{TagE} \leftarrow 0$ 
39.     $\text{Intrpt} \leftarrow 0$ 
40.    For each element  $\zeta$  ( $p$ -th) in  $\omega$  do
41.      If  $\zeta=1$ 
42.        If  $\text{TagS} = 0$ 
43.           $\text{TagS} \leftarrow p$ 
44.           $\text{TagE} \leftarrow p$ 
45.        Else
46.           $\text{TagE} \leftarrow p$ 
47.        End If
48.       $\text{Intrpt} \leftarrow 0$ 
49.    Else
50.      If  $\text{Tag} \neq 0$ 
51.         $\text{Intrpt} \leftarrow \text{Intrpt} + 1$ 
52.        If  $\text{Intrpt} > 2 \times k$ 
53.          Add  $(\text{TagS}, \text{TagE})$  to  $\mathbf{f}$  //  $\mathbf{f}$  denotes segments of interest
```

```

54.            $TagS \leftarrow 0$ 
55.       End If
56.   End If
57. End If
58. End For
59. For each segment  $\phi$  in  $f$  do
60.      $\varepsilon \leftarrow 0$ 
61.     For each sequence  $i'$  in group  $\vartheta(i)$  do
62.       For each  $k$ -mer  $\kappa$  in  $\phi$  do
63.          $\varepsilon \leftarrow \varepsilon + \mathbf{M}(i', L(\kappa))$ 
64.       End For
65.     End For
66.     If  $\varepsilon < \Gamma(i) \times l$  //  $l$  denotes the length of the fragment, i.e.,  $TagE - TagS$ 
67.       Add  $f$  as a LGT.
68.       // Update Matrix  $\mathbf{R}$ 
69.        $\mathbf{R}(i, j) \leftarrow 0$ 
70.     End If
71.   End For
72.    $(i, j, v) \leftarrow \mathbf{Fmax}(\mathbf{R})$ 
73. End While
74. End Begin

```

## 2 Details of our simulation

The simulation process is as follows:

### Step 1: Generate groups

- Generate one random sequence as ancestor of all sequences.
- Set a phylogenetic tree to generate different groups. Here, we use a 4-level full binary tree, thus generating 16 sequences, each of which will become the ancestor of a group. The branch lengths of the tree are identical and control the variation between groups.

### Step 2: Generate individuals in each group

- Pick one sequence generated in last step as the ancestor of a group.
- Set a phylogenetic tree to generate individuals. As with the last step, we use a 4-level full binary tree to generate 16 individuals. The branch lengths of the tree are identical and control the variation within groups.
- Repeat the previous two lines until all sequences generated in Step 1 have been used.

256 sequences are generated in this step.

### Step 3: Add LGT events

- Set the total number of LGT events. We use 20 in our experiments.
- Determine the distribution of LGT events. We take LGTs only to group 1 from other groups. The LGT donors are distributed evenly (5 each) among the following four sets: group 2, groups 3 and 4, groups 5 to 8, and groups 9 to 16.

### Step 4: Evolve post-LGT

- Set a 2-level full binary tree. The branch lengths are identical and control the variation post-LGT.
- Let every sequence evolve following this tree, and add deletion simultaneously to get 4 descendants.
- Randomly pick one descendant from each sequence.

This generates a final simulation dataset with 256 sequences.

### Parameters

Variation between = 0.01, 0.05, 0.1, 0.15, 0.2, within = 0.01, post\_LGT = 0, deletion = 0,  $k=40$

Variation between = 0.1, within = 0.001, 0.005, 0.01, 0.015, post\_LGT = 0, deletion = 0,  $k=40$

Variation between = 0.1, within = 0.01, post\_LGT = 0, 0.02, 0.04, 0.06, 0.08, 0.1, deletion = 0, 0.025, 0.05, 0.075, 0.1, 0.125,  $k = 40$

$\pi_T = \pi_C = \pi_A = \pi_G = 0.25, \kappa = 2$  under HYK85 model.

$\pi_T = 0.291, \pi_C = 0.275, \pi_A = 0.304, \pi_G = 0.130, \kappa = 2$  under F84 model.

**3 Coordinates of simulated and inferred LGT regions in Group 1 for Figure 2**

| Simulated LGT |        | Inferred LGT |        | Recipient<br>(Sequence) | Donor<br>(Group) |
|---------------|--------|--------------|--------|-------------------------|------------------|
| Start         | Length | Start        | Length |                         |                  |
| 297           | 95     | 297          | 97     | 1                       | 16               |
| 182           | 56     | 182          | 56     | 4                       | 16               |
| 786           | 177    | 786          | 177    | 7                       | 15               |
| 614           | 170    | 614          | 172    | 4                       | 15               |
| 532           | 142    | 532          | 143    | 15                      | 11               |
| 552           | 131    | 552          | 131    | 7                       | 6                |
| 157           | 50     | 157          | 50     | 7                       | 8                |
| 739           | 50     | 739          | 50     | 1                       | 5                |
| 722           | 51     | 722          | 53     | 13                      | 6                |
| 92            | 50     | 92           | 53     | 5                       | 7                |
| 445           | 95     | 444          | 96     | 6                       | 3                |
| 112           | 50     | 111          | 52     | 3                       | 4                |
| 163           | 115    | 161          | 118    | 14                      | 4                |
| 62            | 167    | 62           | 169    | 15                      | 3                |
| 585           | 206    | 585          | 206    | 2                       | 3                |
| 662           | 134    | 662          | 215    | 11                      | 2                |
| 562           | 66     | 562          | 66     | 3                       | 2                |
| 525           | 127    | 525          | 127    | 1                       | 2                |
| 39            | 96     | 38           | 98     | 1                       | 2                |
| 58            | 117    | --           | --     | 2                       | 2                |

#### 4 Performance of TF-IDF under the F84 model (variation between and within groups)

Here we replicate the TF-IDF analyses shown in Figures 3 and 4, under the F84 evolution model.

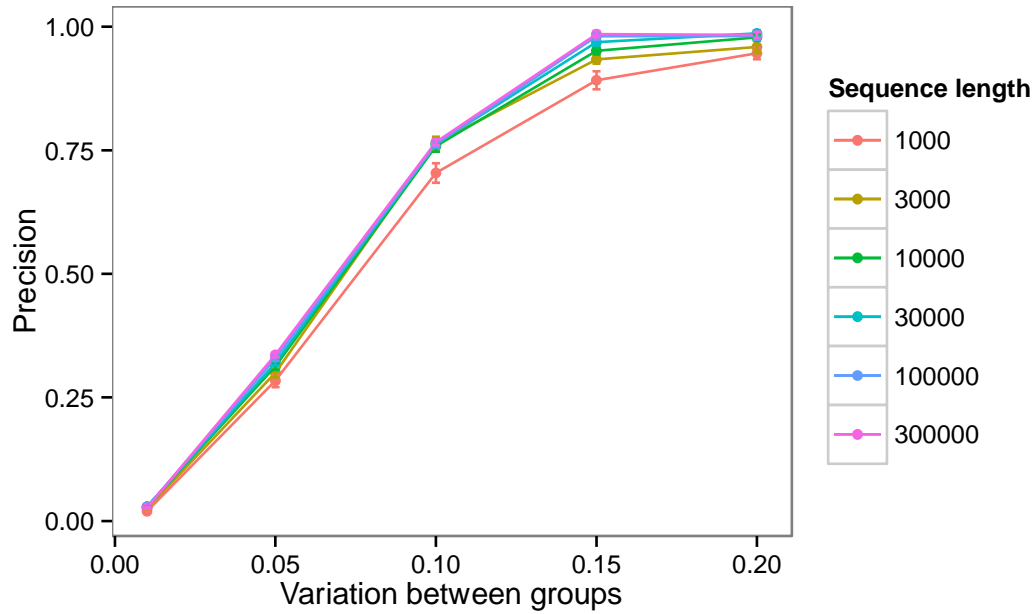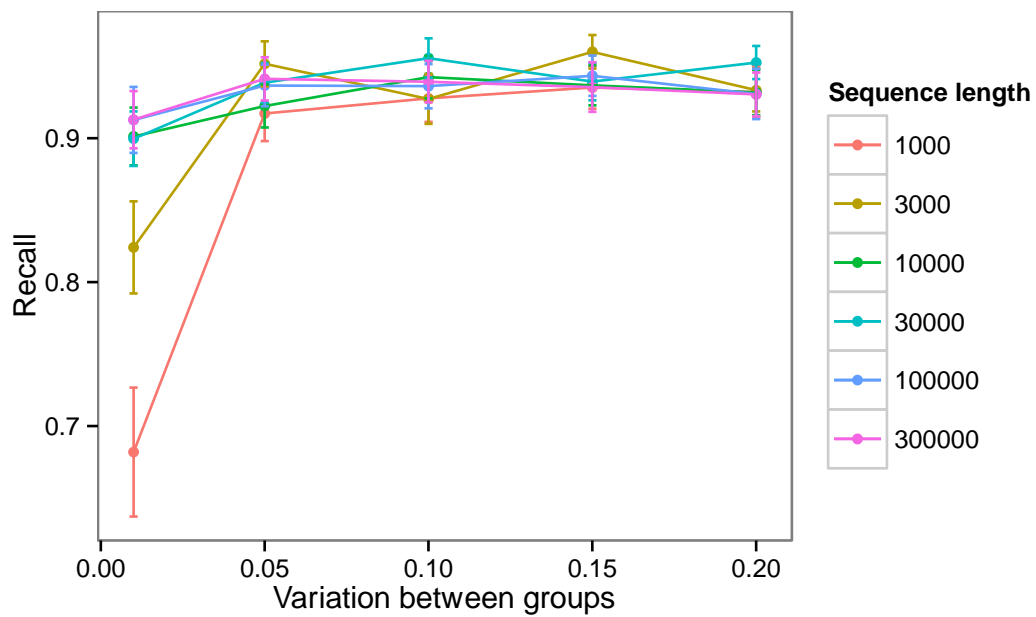

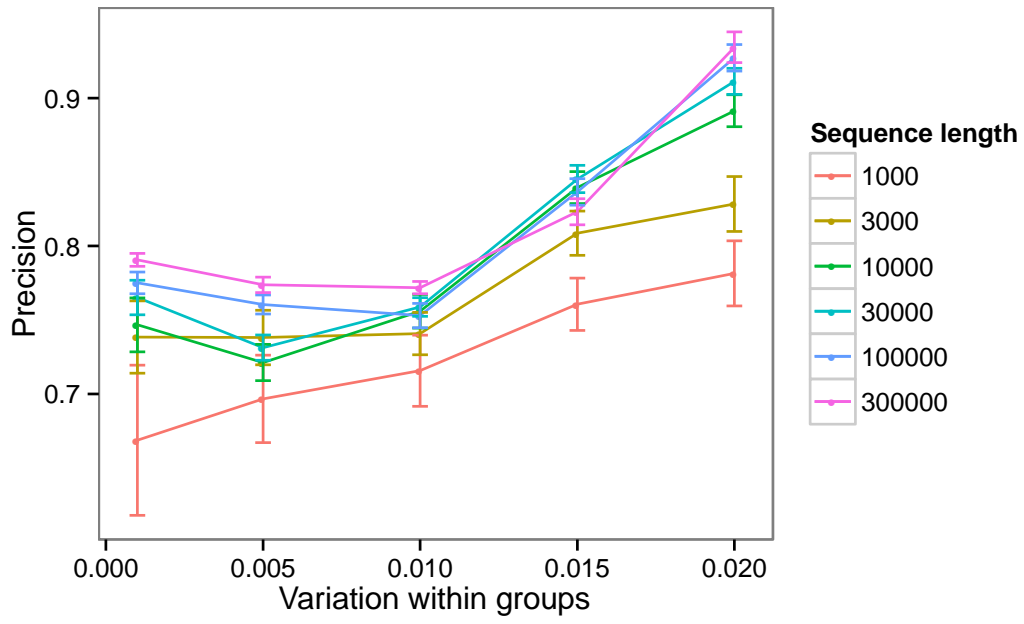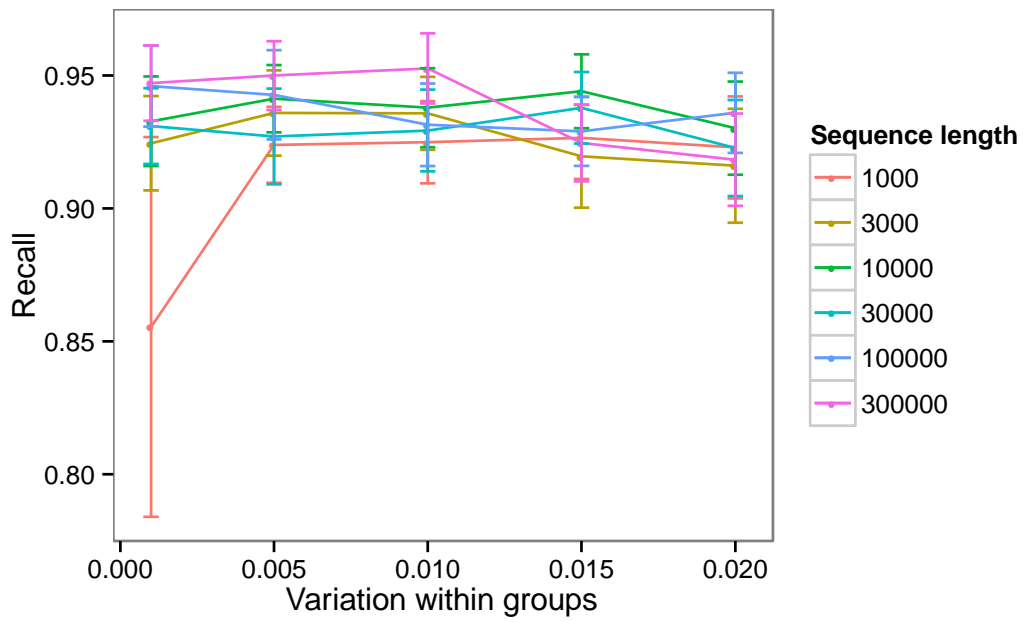

## 5 Full comparison of recall of TF-IDF and ALFY for variation within groups

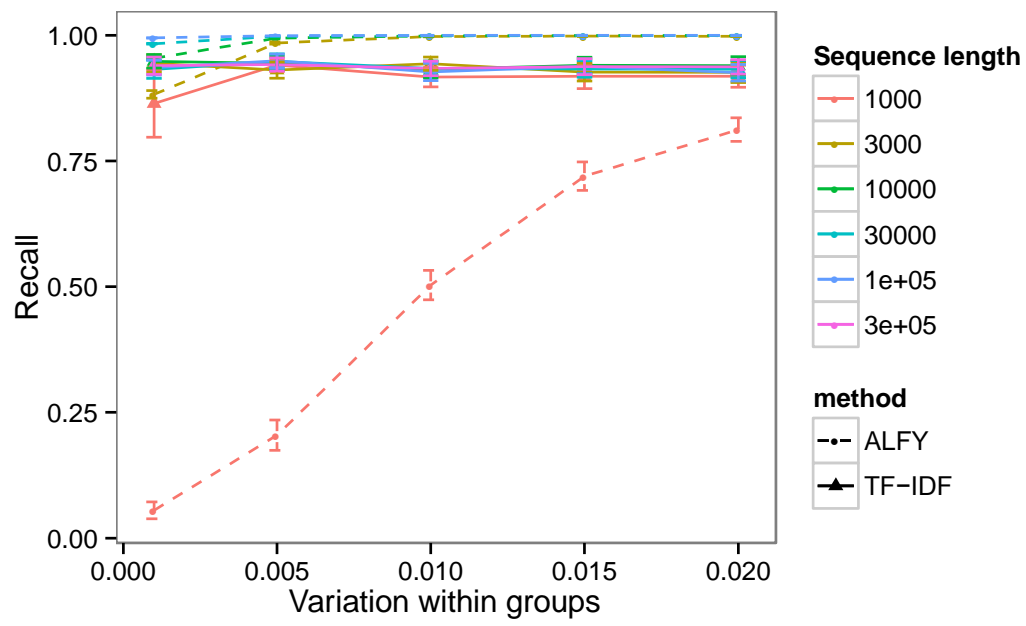



## 6 Performance of TF-IDF with variation post-LGT and deletion with different sequence lengths.

Performance on variation post-LGT and deletion (sequence length = 100,000 nt)

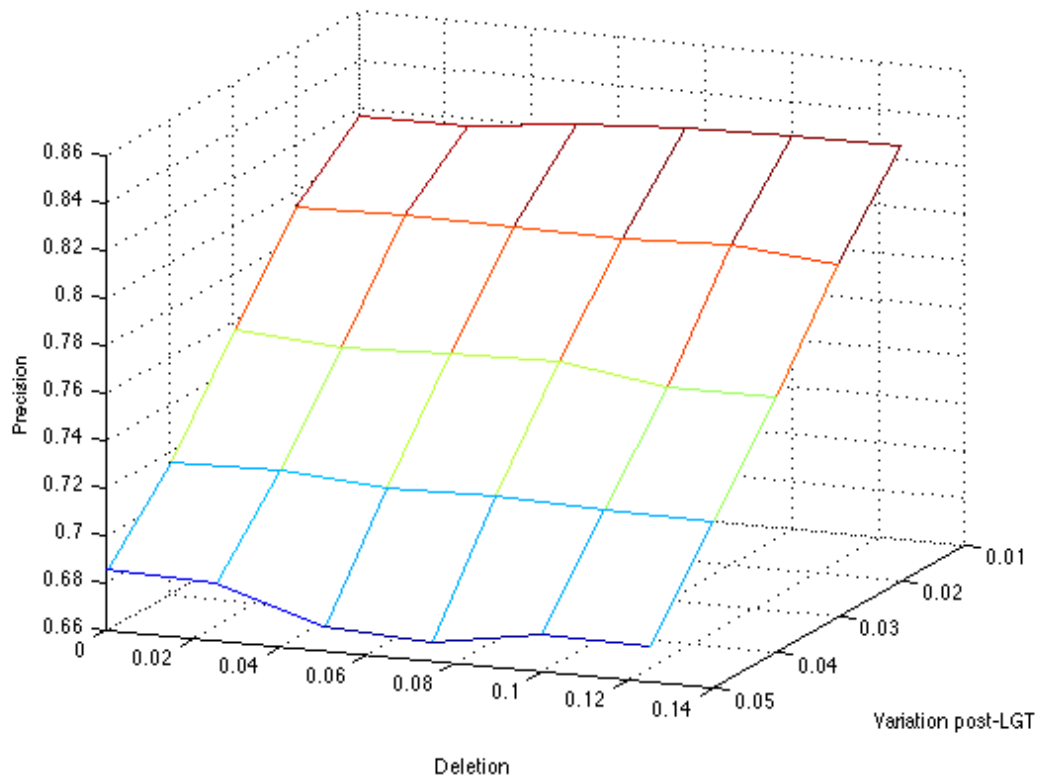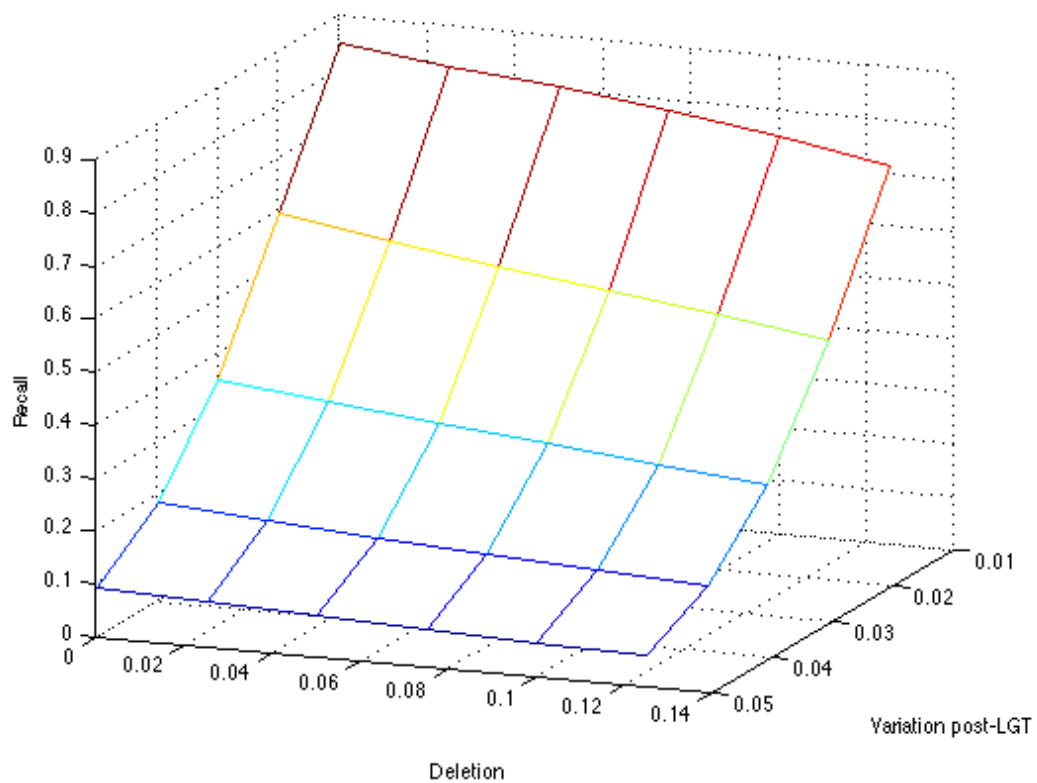

**Performance on variation post-LGT and deletion (sequence length = 30,000 nt)**

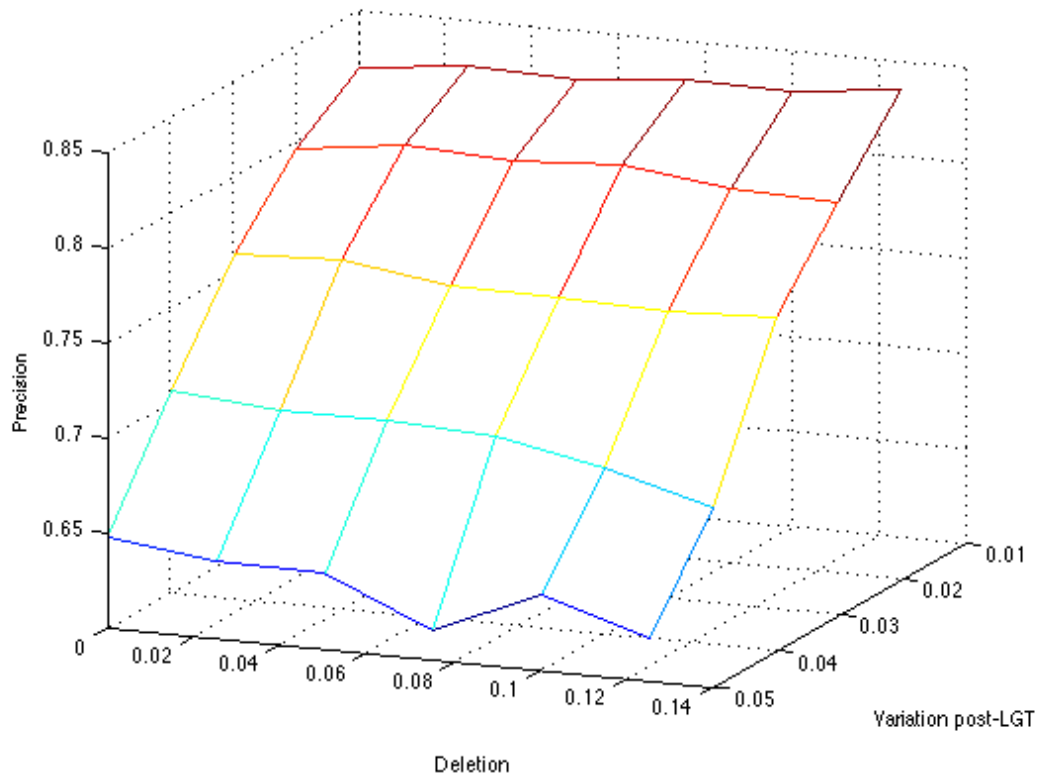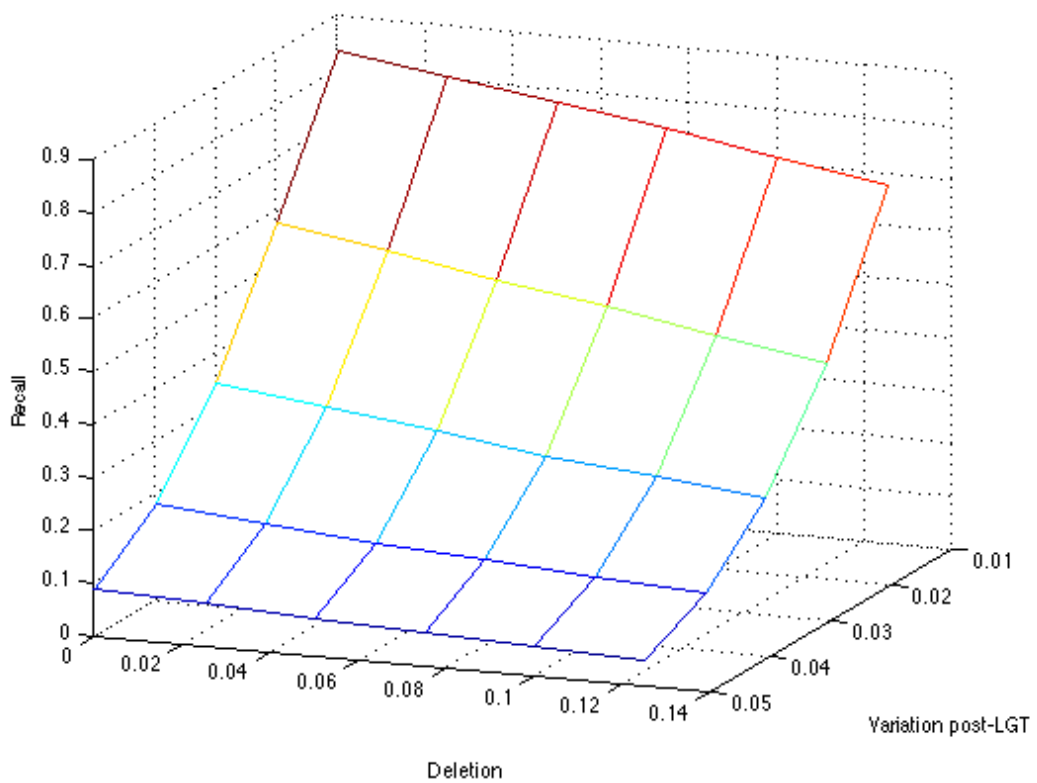

**Performance on variation post-LGT and deletion (sequence length = 10,000 nt)**

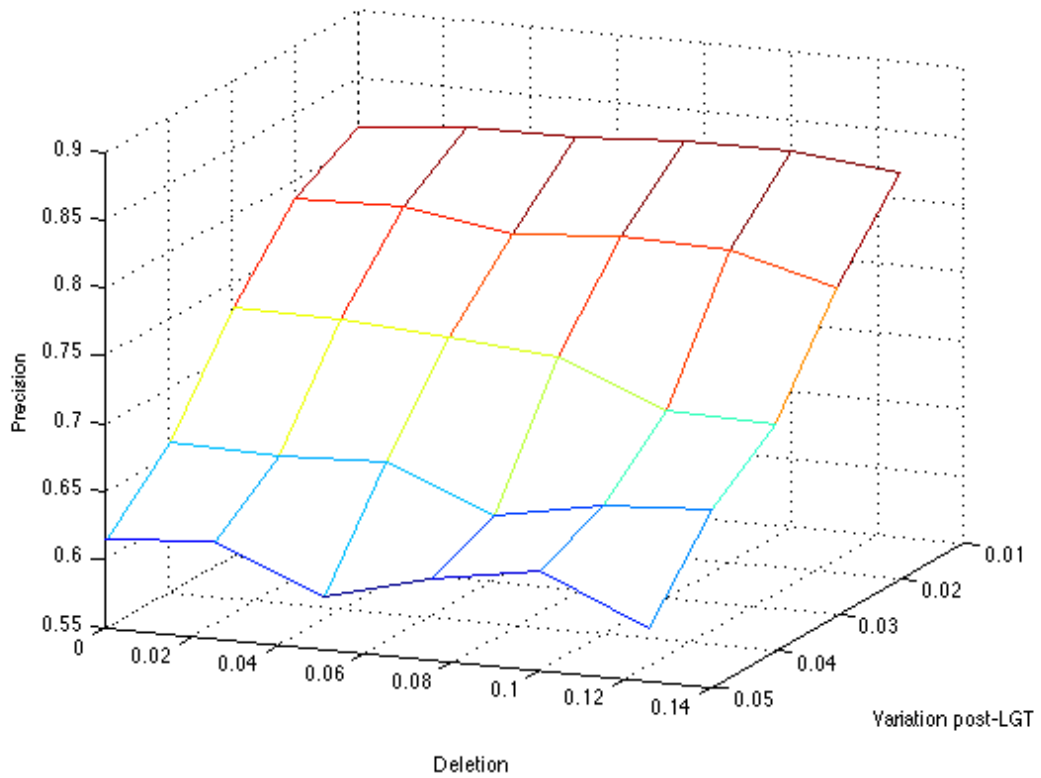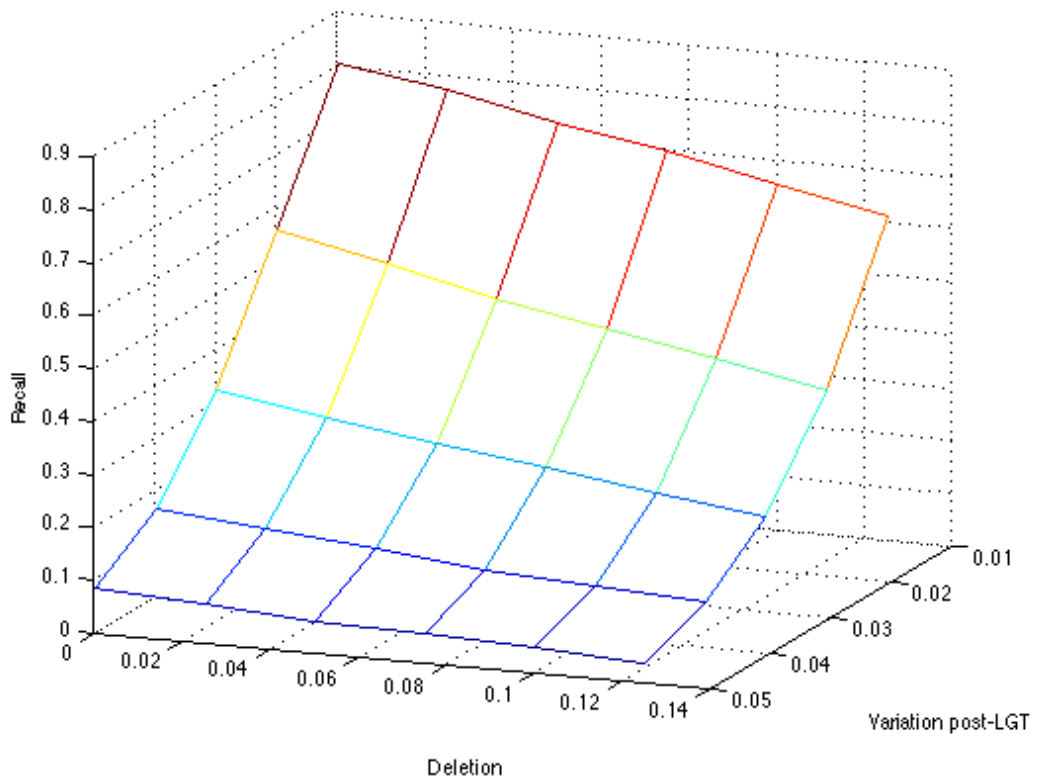

**Performance on variation post-LGT and deletion (sequence length = 3,000 nt)**

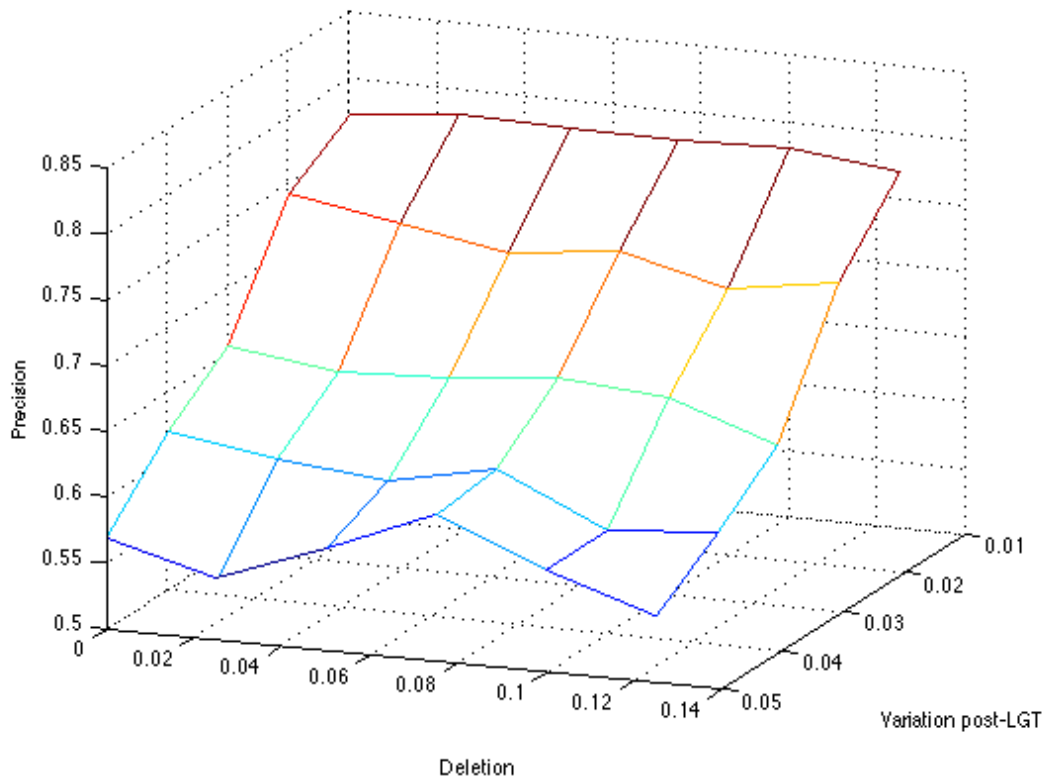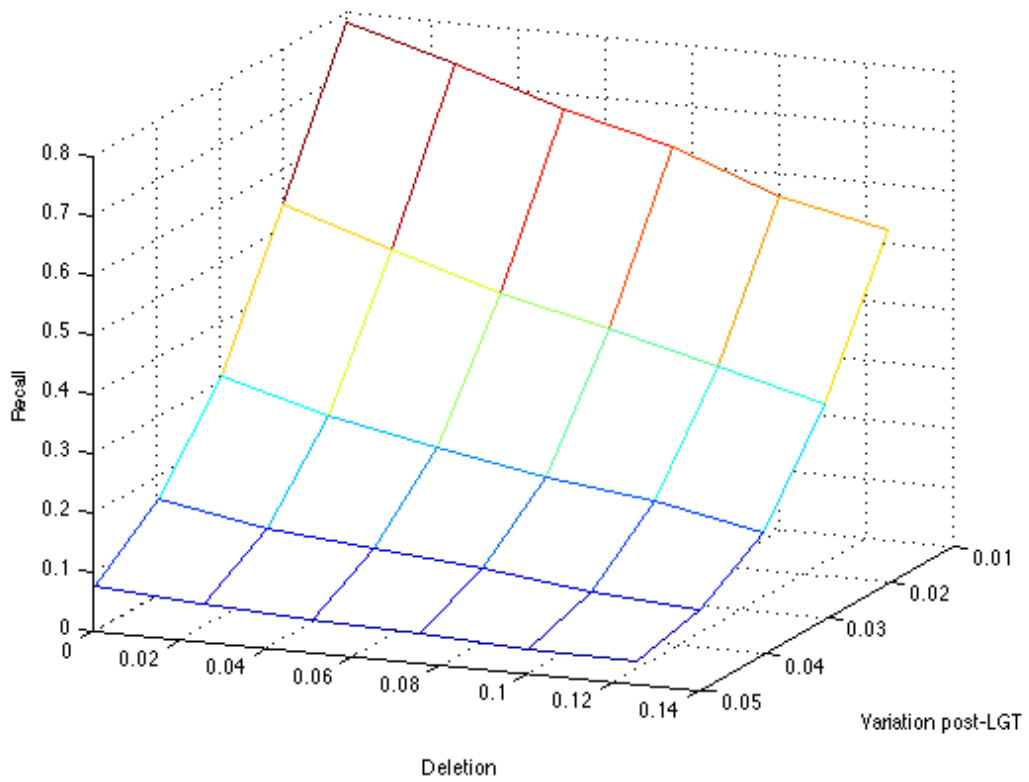

**Performance on variation post-LGT and deletion (sequence length = 1,000 nt)**

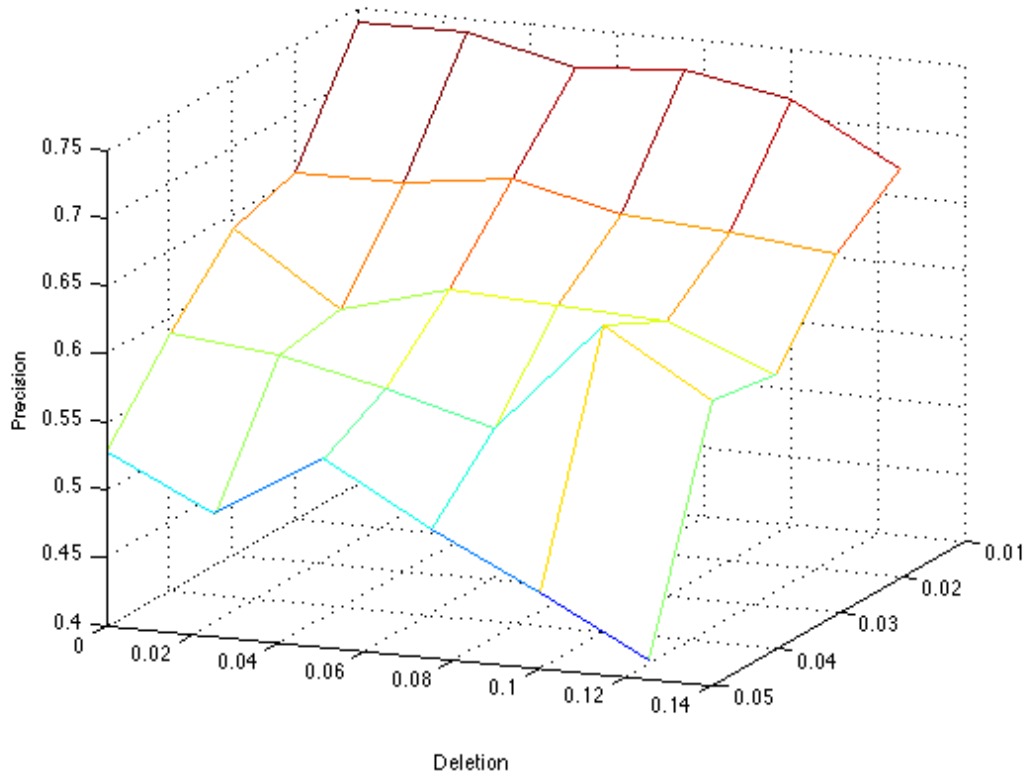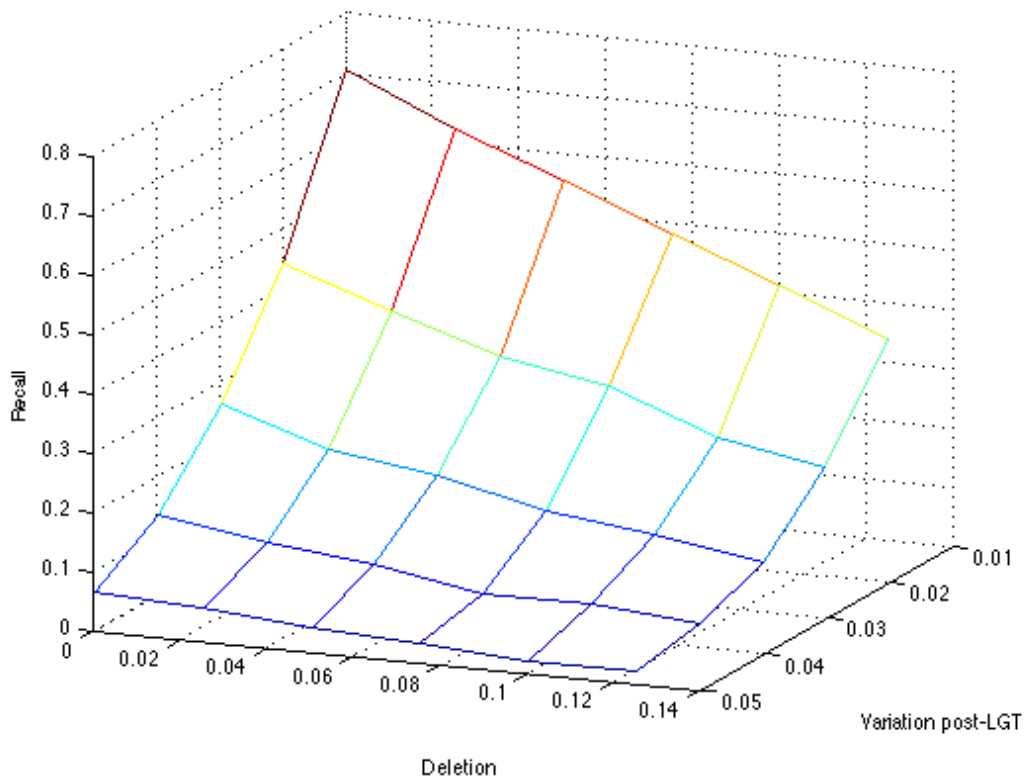

**7 Supplementary Table S1. Detection of lateral regions in *Staphylococcus aureus* TW20 by TF-IDF, at  $k = 30$  and  $k = 40$**

Annotated functions of proteins fully or partially contained within an LGT region of *Staphylococcus aureus* TW20, as discovered in this dataset by TF-IDF ( $k = 40$ ). The first row is the length range of LGT segments selected for analysis.

|                                     |                     | 2000-3999 nt | 4000-5999nt | 6000+ nt | 2000+ nt | 2000+ nt |
|-------------------------------------|---------------------|--------------|-------------|----------|----------|----------|
| Annotated function <sup>1</sup>     | Annotated in genome | Number       | Number      | Number   | Number   | %        |
| adhesion / adhesion                 | 4                   | 0            | 0           | 2        | 2        | 50       |
| antiporter                          | 10                  | 1            | 0           | 1        | 2        | 20       |
| capsular polysaccharide             | 16                  | 0            | 0           | 16       | 16       | 100      |
| capsule                             | 3                   | 0            | 0           | 3        | 3        | 100      |
| coagulase                           | 1                   | 0            | 0           | 1        | 1        | 100      |
| efflux                              | 4                   | 1            | 0           | 1        | 2        | 50       |
| integrase                           | 9                   | 0            | 1           | 0        | 1        | 11       |
| lactamase                           | 8                   | 0            | 0           | 5        | 5        | 62       |
| lysine                              | 13                  | 0            | 0           | 1        | 1        | 8        |
| metalloproteinase /metallopeptidase | 3                   | 1            | 0           | 1        | 2        | 66       |
| penicillin                          | 6                   | 1            | 0           | 3        | 4        | 66       |
| permease                            | 45                  | 8            | 5           | 18       | 31       | 69       |
| phage                               | 249                 | 12           | 14          | 0        | 26       | 11       |
| recombinase                         | 6                   | 0            | 0           | 0        | 0        | 0        |
| resistance protein                  | 9                   | 0            | 1           | 1        | 2        | 22       |
| restriction                         | 9                   | 0            | 0           | 3        | 3        | 33       |
| siderophore                         | 5                   | 0            | 0           | 5        | 5        | 100      |
| surface protein                     | 5                   | 1            | 1           | 4        | 6        | 100      |
| toxin                               | 19                  | 1            | 0           | 0        | 1        | 5        |
| transport protein                   | 28                  | 3            | 1           | 7        | 11       | 39       |
| transporter                         | 98                  | 14           | 3           | 28       | 45       | 46       |
| transposase                         | 30                  | 0            | 2           | 2        | 4        | 13       |
| uptake                              | 4                   | 1            | 1           | 0        | 2        | 50       |
| ribosomal protein                   | 60                  | 2            | 1           | 5        | 8        | 13       |
| polymerase (DNA/RNA)                | 15                  | 5            | 2           | 1        | 8        | 53       |

Annotated functions of proteins fully or partially contained within an LGT region of *Staphylococcus aureus* TW20, as discovered in this dataset by TF-IDF ( $k = 30$ ). The first row is the length range of LGT segments selected for analysis.

|                                     |                     | 2000-3999 nt | 4000-6499 nt | 6500+ nt | 2000+ nt         | 2000+ nt |
|-------------------------------------|---------------------|--------------|--------------|----------|------------------|----------|
| Annotated function <sup>1</sup>     | Annotated in genome | Number       | Number       | Number   | Number           | %        |
| adhesion / adhesion                 | 4                   | 0            | 0            | 4        | 4                | 100      |
| antiporter                          | 10                  | 7            | 0            | 1        | 8                | 80       |
| capsular polysaccharide             | 16                  | 0            | 0            | 16       | 16               | 100      |
| capsule                             | 3                   | 0            | 0            | 3        | 3                | 100      |
| coagulase                           | 1                   | 0            | 0            | 1        | 1                | 100      |
| efflux                              | 4                   | 1            | 1            | 1        | 3                | 75       |
| integrase                           | 9                   | 2            | 1            | 0        | 3                | 33       |
| lactamase                           | 8                   | 1            | 0            | 4        | 5                | 62       |
| lysine                              | 13                  | 2            | 0            | 3        | 5                | 38       |
| metalloproteinase /metallopeptidase | 3                   | 2            | 0            | 1        | 3                | 100      |
| penicillin                          | 6                   | 3            | 2            | 2        | (7) <sup>2</sup> | 100      |
| permease                            | 45                  | 11           | 7            | 15       | 33               | 73       |
| phage                               | 249                 | 13           | 17           | 0        | 30               | 12       |
| recombinase                         | 6                   | 2            | 0            | 0        | 2                | 33       |
| resistance protein                  | 9                   | 1            | 0            | 1        | 2                | 22       |
| restriction                         | 9                   | 0            | 0            | 3        | 3                | 33       |
| siderophore                         | 5                   | 0            | 0            | 5        | 5                | 100      |
| surface protein                     | 5                   | 0            | 1            | 2        | 3                | 60       |
| toxin                               | 19                  | 1            | 0            | 0        | 1                | 5        |
| transport protein                   | 28                  | 8            | 1            | 11       | 20               | 71       |
| transporter                         | 98                  | 26           | 11           | 22       | 59               | 60       |
| transposase                         | 30                  | 4            | 0            | 2        | 6                | 20       |
| uptake                              | 4                   | 1            | 1            | 1        | 3                | 75       |
| ribosomal protein                   | 60                  | 13           | 9            | 32       | 54               | 90       |
| polymerase (DNA/RNA)                | 15                  | 5            | 2            | 5        | 12               | 80       |

Notes:

1. As annotated in GenBank NC\_017331.1
2. The 5' and 3' ends of the penicillin binding protein 2B gene fall into different inferred LGT regions.
